# Supplementary material
Source: Royal Society of Chemistry journal article supplement (doi:10.1039/d6ta03045a)
Supplement: d6ta03045a1.pdf [file d6ta03045a1.pdf]

## Supplementary Material

### **Fe<sub>3</sub>C/Fe Nanoparticles Embedded in N-Doped Carbon as Catalysts for Electrocatalytic Nitrogen Reduction to Ammonia**

*Song Zhang, Ling-Ling Shan, Jing-Jing Liang, Ze-Zheng Xiao and Shao-Wei Bian\**

College of Chemistry and Chemical Engineering, Donghua University, Shanghai  
201620, China

*E-mail: swbian@dhu.edu.cn*

#### **Experimental section:**

**Determination of NH<sub>3</sub>:** The ammonia concentration was determined by the indophenol blue method. Chromogenic agent A: 2 g NaOH was dissolved in 50 mL deionized water, then 5% (mass fraction) salicylic acid and 5% (mass fraction) sodium citrate were added. Chromogenic agent B: 1.8 g sodium hypochlorite solution was weighed and added to 50 mL deionized water to obtain 0.05 M NaClO solution. Chromogenic agent C: 0.1 g sodium nitroprusside was added to 9.9 mL deionized water to obtain 1 wt% sodium nitroprusside solution. 2 mL electrolyzed solution, 2 mL chromogenic agent A, 1 mL chromogenic agent B, and 0.2 mL chromogenic agent C were mixed in the dark for 2 h. An appropriate amount of the solution was

placed in a colorimetric tube for testing, and the absorbance at a wavelength of 655 nm was recorded. The standard working curve of ammonia concentration was established by gradually diluting  $\text{NH}_4\text{Cl}$  solution. The absorbances of  $\text{NH}_4^+$  with the concentration of 0.00, 0.02, 0.04, 0.08, 0.16, 0.32, and  $0.64 \mu\text{g mL}^{-1}$  were recorded respectively, and the relationship between absorbance and ammonia concentration was obtained by linear fitting (Figures S1 and S2).

**Determination of  $\text{N}_2\text{H}_4$ :** The detection method for the possible by-product  $\text{N}_2\text{H}_4$  is based on the Watt-Chrisp method. First, 2 g p-dimethylaminobenzaldehyde (p- $\text{C}_9\text{H}_{11}\text{NO}$ ) was mixed with 10 mL concentrated hydrochloric acid, then 100 mL ethanol solution was added and mixed uniformly as the chromogenic agent. 3 mL electrolyzed solution was added to 3 mL chromogenic agent and stood for 15 min. The absorbance at a wavelength of 455 nm was recorded. The absorbance of  $\text{N}_2\text{H}_4$  with a concentration of 0.0, 0.2, 0.4, 0.6, and  $0.8 \mu\text{g mL}^{-1}$  were recorded respectively, and the relationship between absorbance and  $\text{N}_2\text{H}_4$  concentration was obtained by linear fitting (Figures S3 and S4).

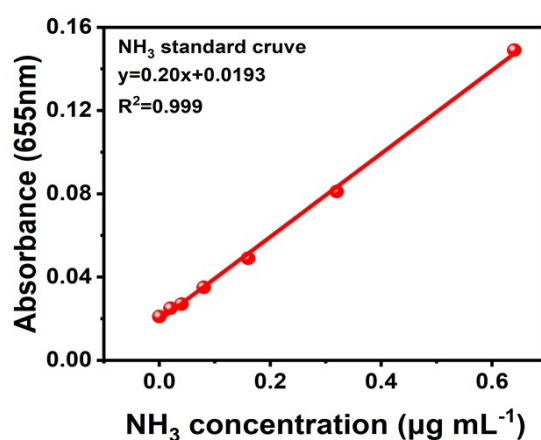

**Figure S1.** Calibration curve for determining  $\text{NH}_3$ .

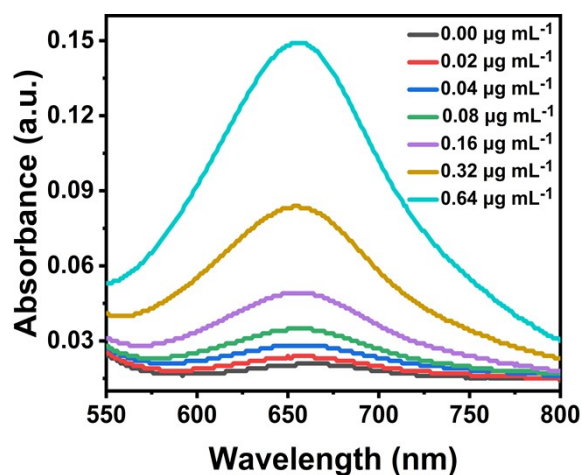

**Figure S2.** UV-Vis absorption spectra of standard  $\text{NH}_3$  solutions in 0.1 M KOH electrolyte solution.

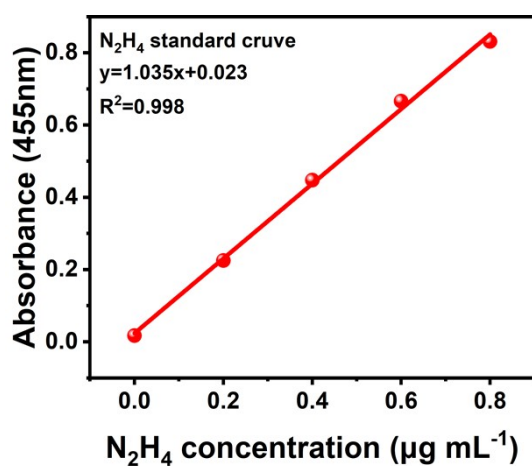

**Figure S3.** Calibration curve for determining  $\text{N}_2\text{H}_4$ .

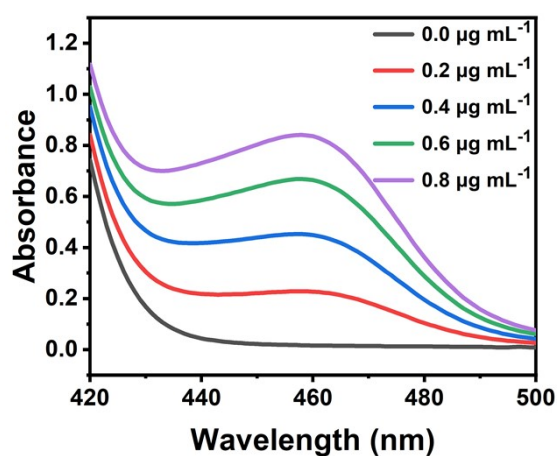

**Figure S4.** UV-Vis absorption spectra of standard  $\text{N}_2\text{H}_4$  solutions in 0.1 M KOH electrolyte solution.

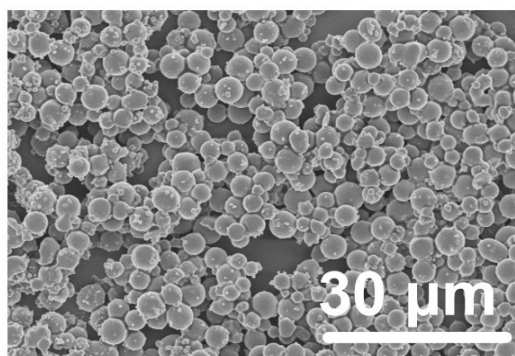

**Figure S5.** SEM image of the precursor of NC before calcination.

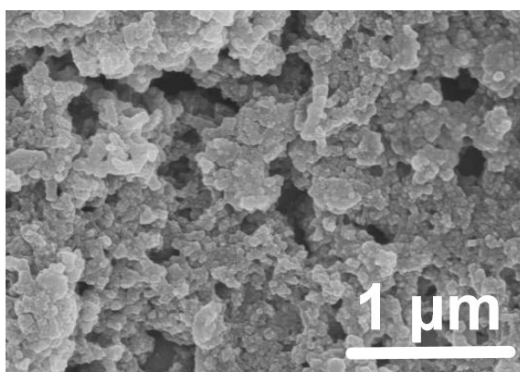

**Figure S6.** SEM image of the precursor of Fe<sub>3</sub>C/Fe@NC before calcination.

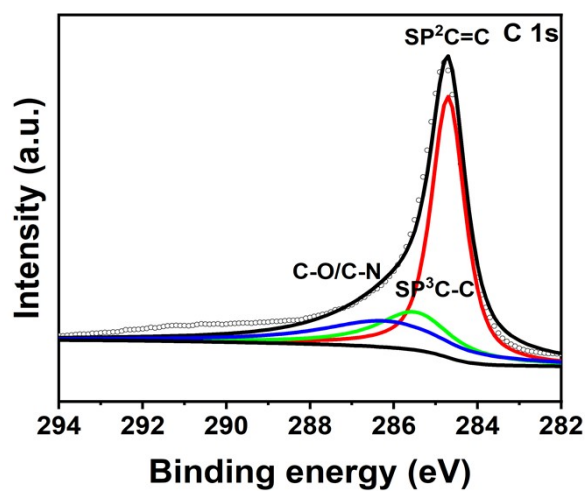

**Figure S7.** High-resolution XPS spectrum of C1s.

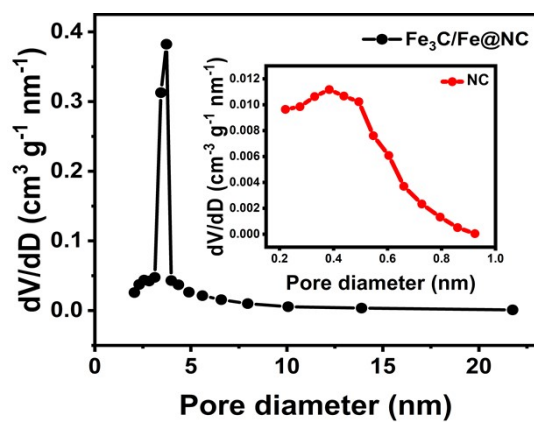

Figure S8. Pore size distribution of Fe<sub>3</sub>C/Fe@NC and NC.

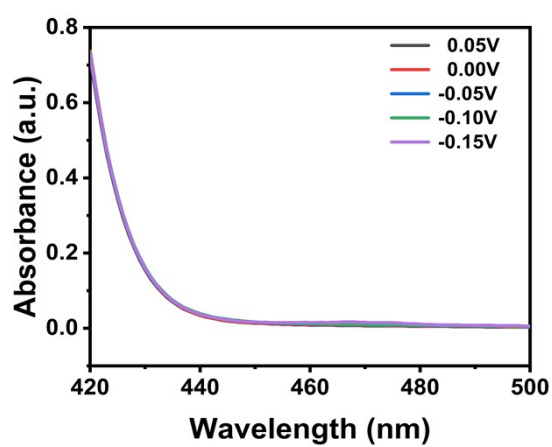

Figure S9. UV-vis absorption spectra of N<sub>2</sub>H<sub>4</sub> at different voltages.

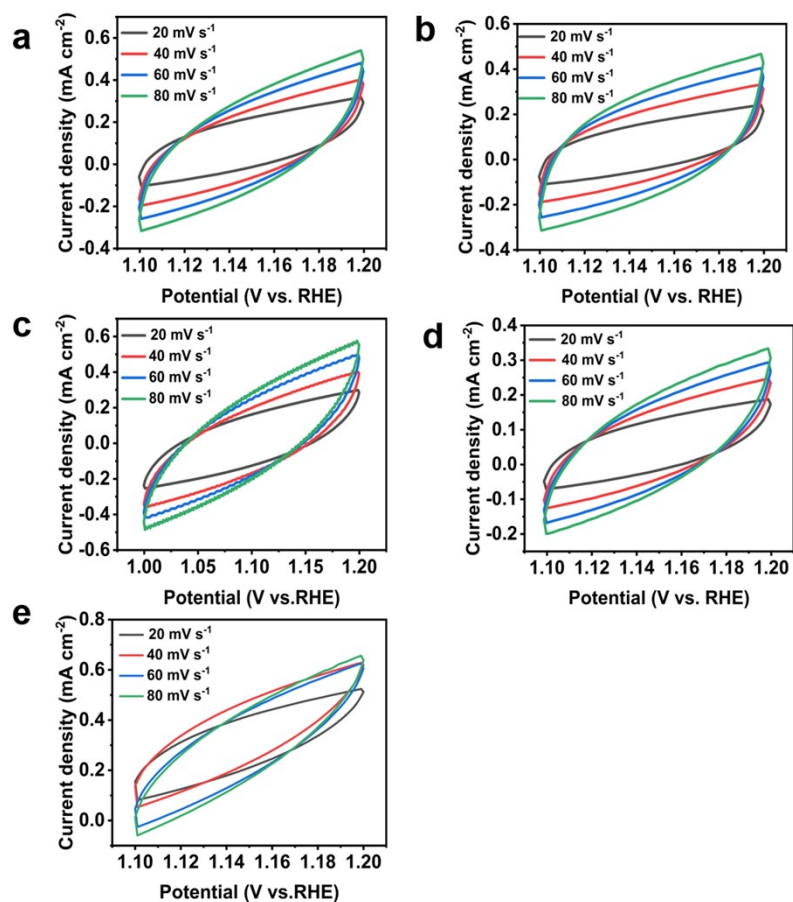

**Figure S10.** CV of (a) Fe<sub>3</sub>C/Fe@NC, (b) NC, (c) Fe<sub>3</sub>C, (d) C and (e) FeNPs at different scan rates.

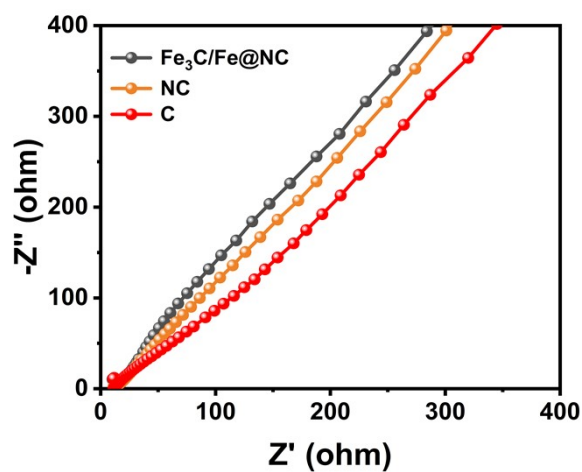

**Figure S11.** The impedance spectrum of Fe<sub>3</sub>C/Fe@NC, NC and C.

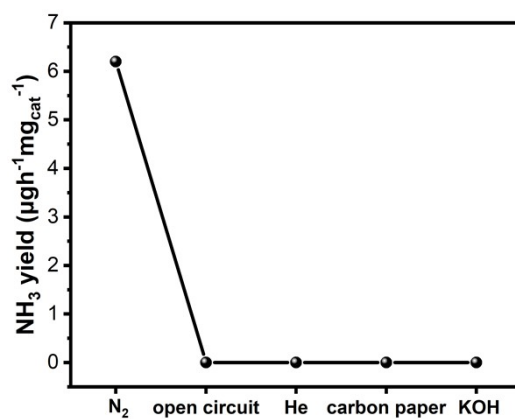

**Figure S12.** Ammonia production rate under different control conditions.

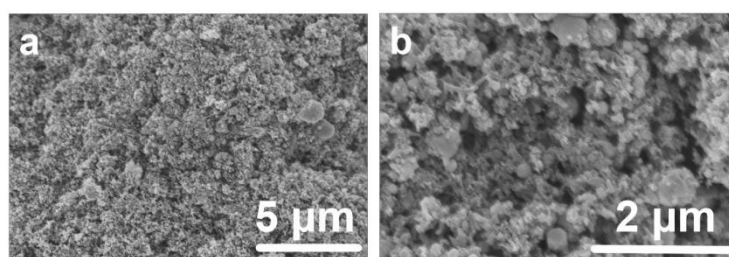

**Figure S13.** (a and b) SEM images of Fe<sub>3</sub>/Fe@NC after the cycling test.

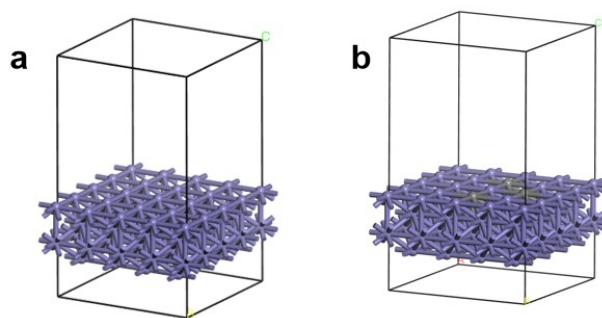

**Figure S14.** The constructed heterostructure models of (a) Fe and (b) Fe<sub>3</sub>C/Fe.

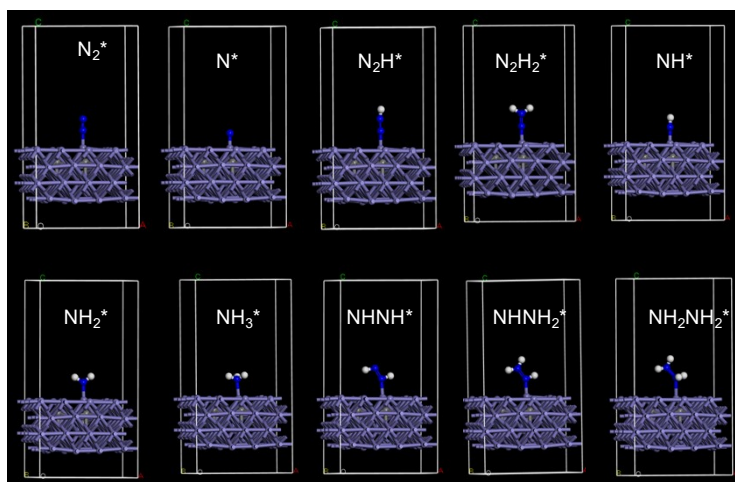

**Figure S15.** The constructed heterostructure models of various nitrogen-containing species supported on Fe<sub>3</sub>C/Fe.
